# Supplementary material
Source: publisher site journal article supplement (https://www.dovepress.com/article/471940)
Supplement: Supplementary file 1 [file get_supplementary_file.php]

**Supplementary data**

**
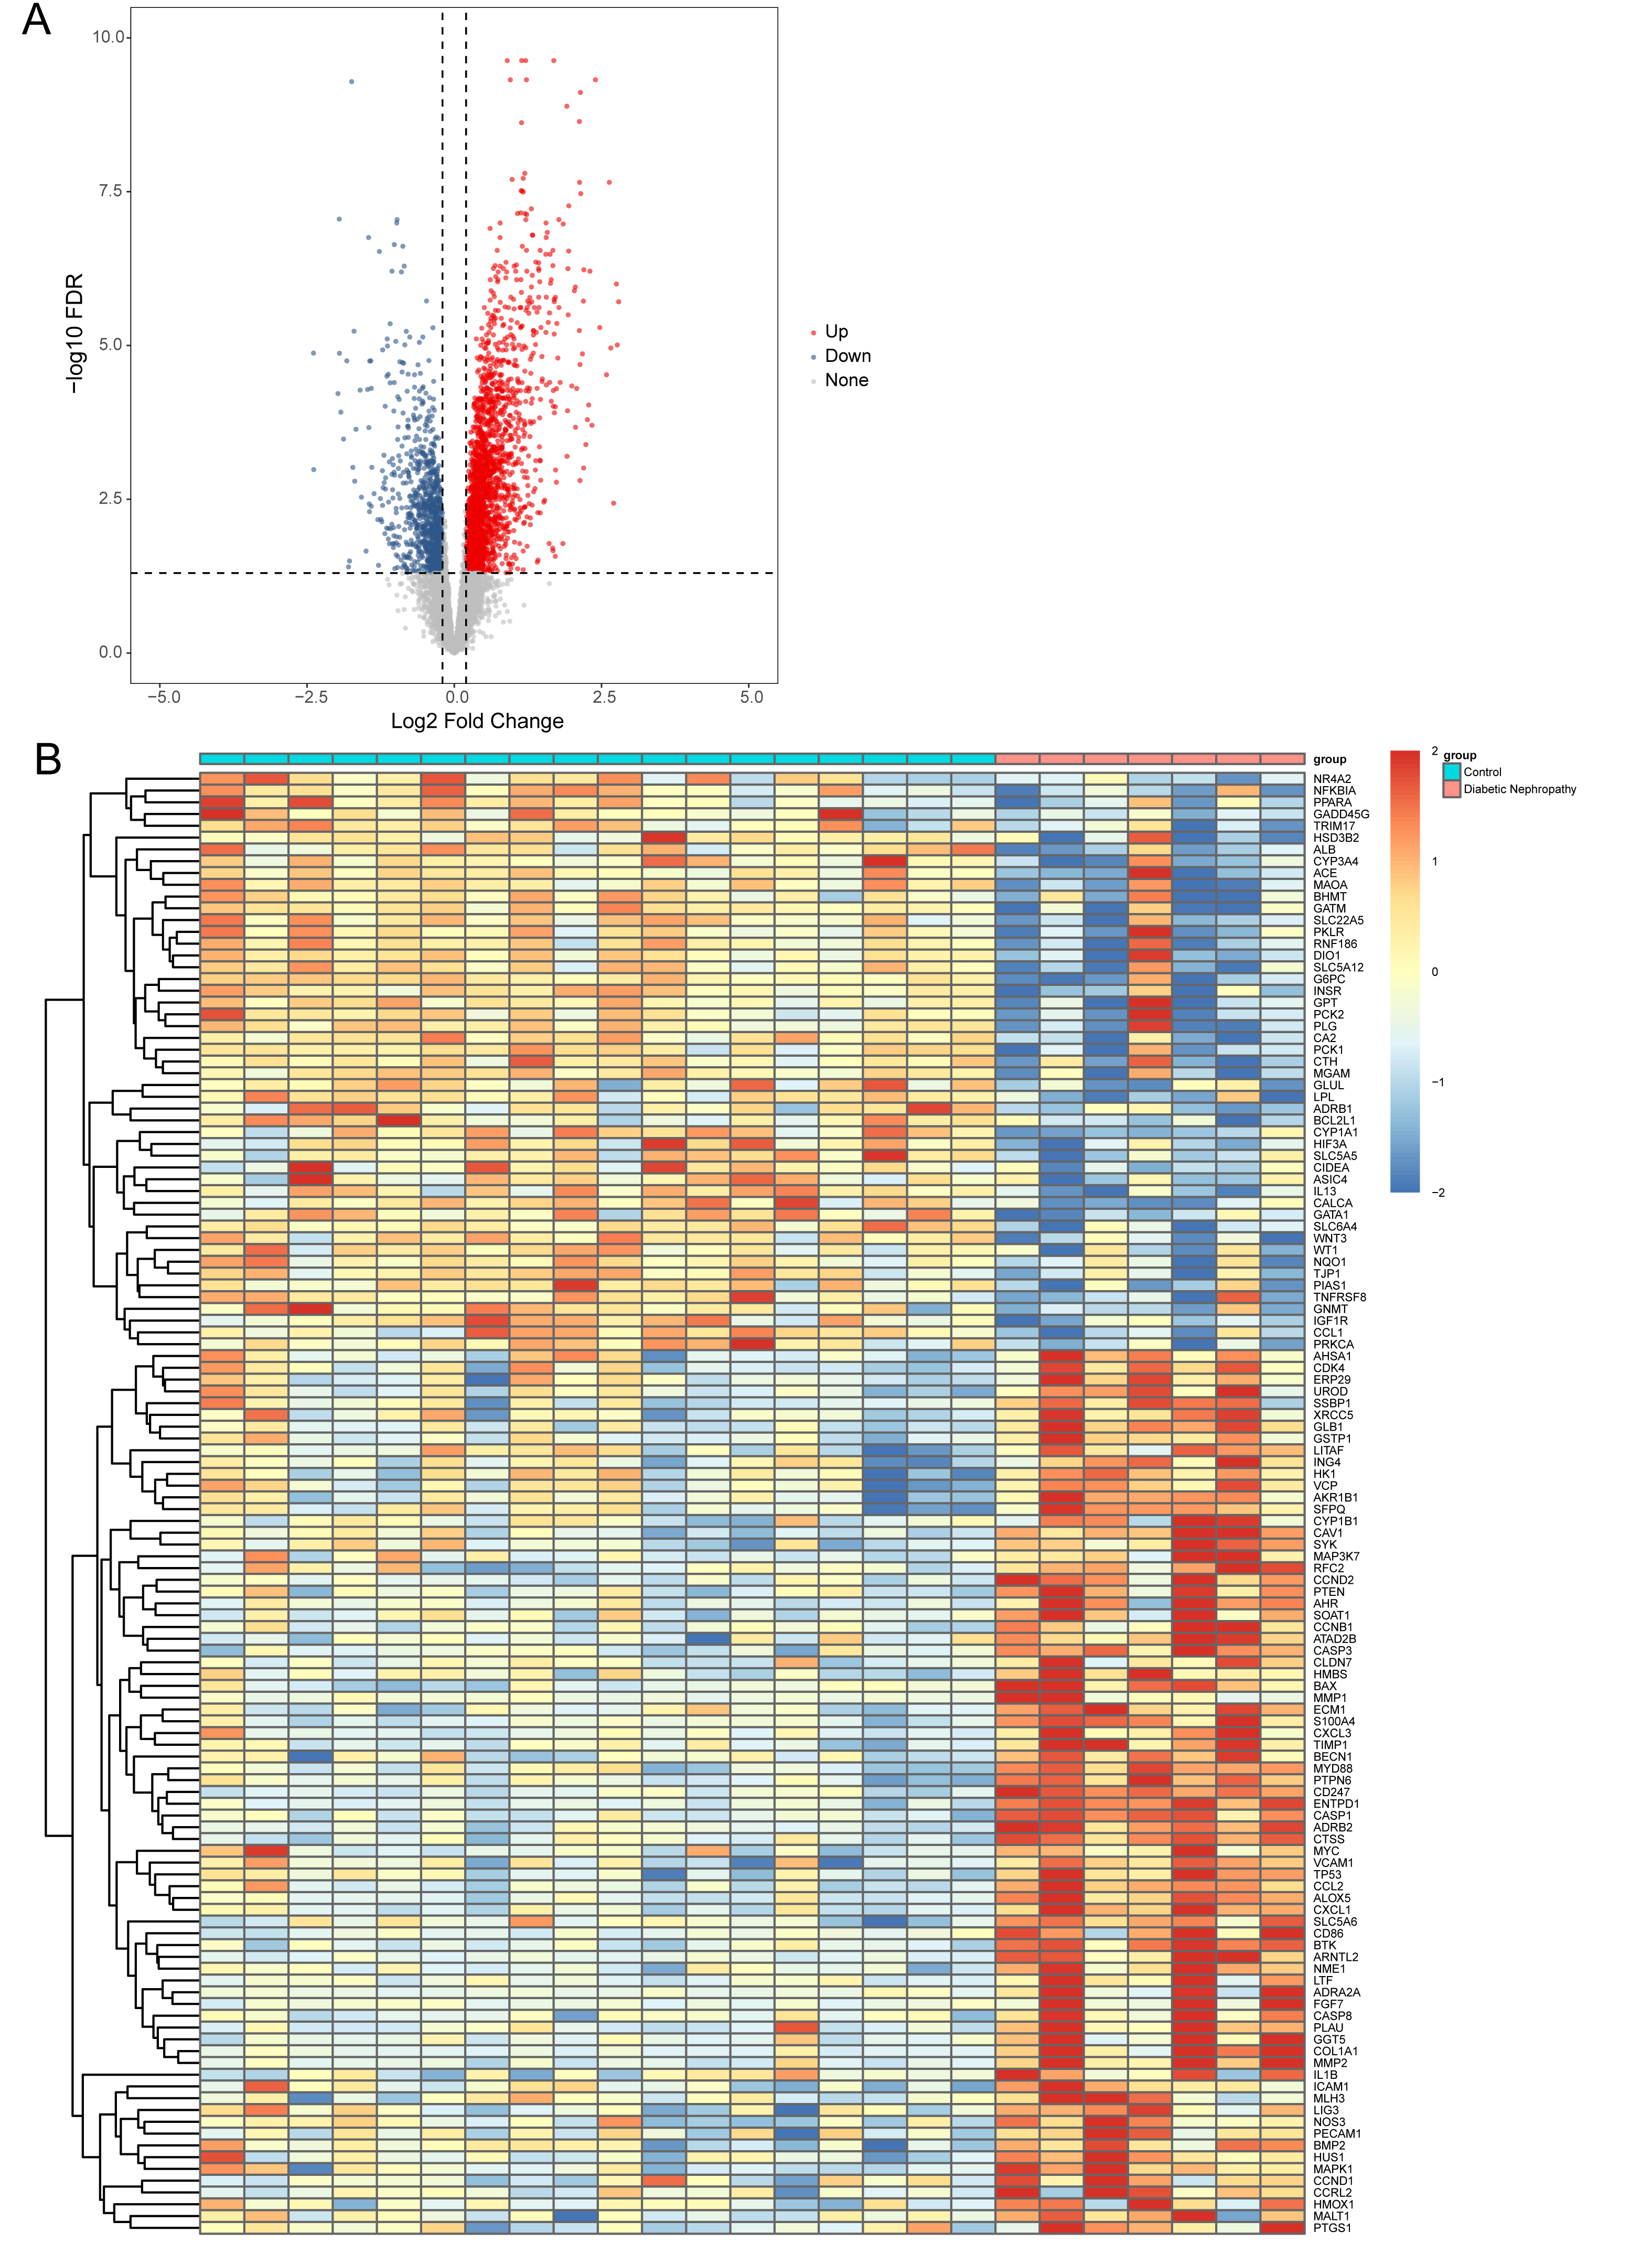
**

**Figure S1. Identification of DEGs in DN samples.** (A) Volcano and (B) heat maps of DEGs.


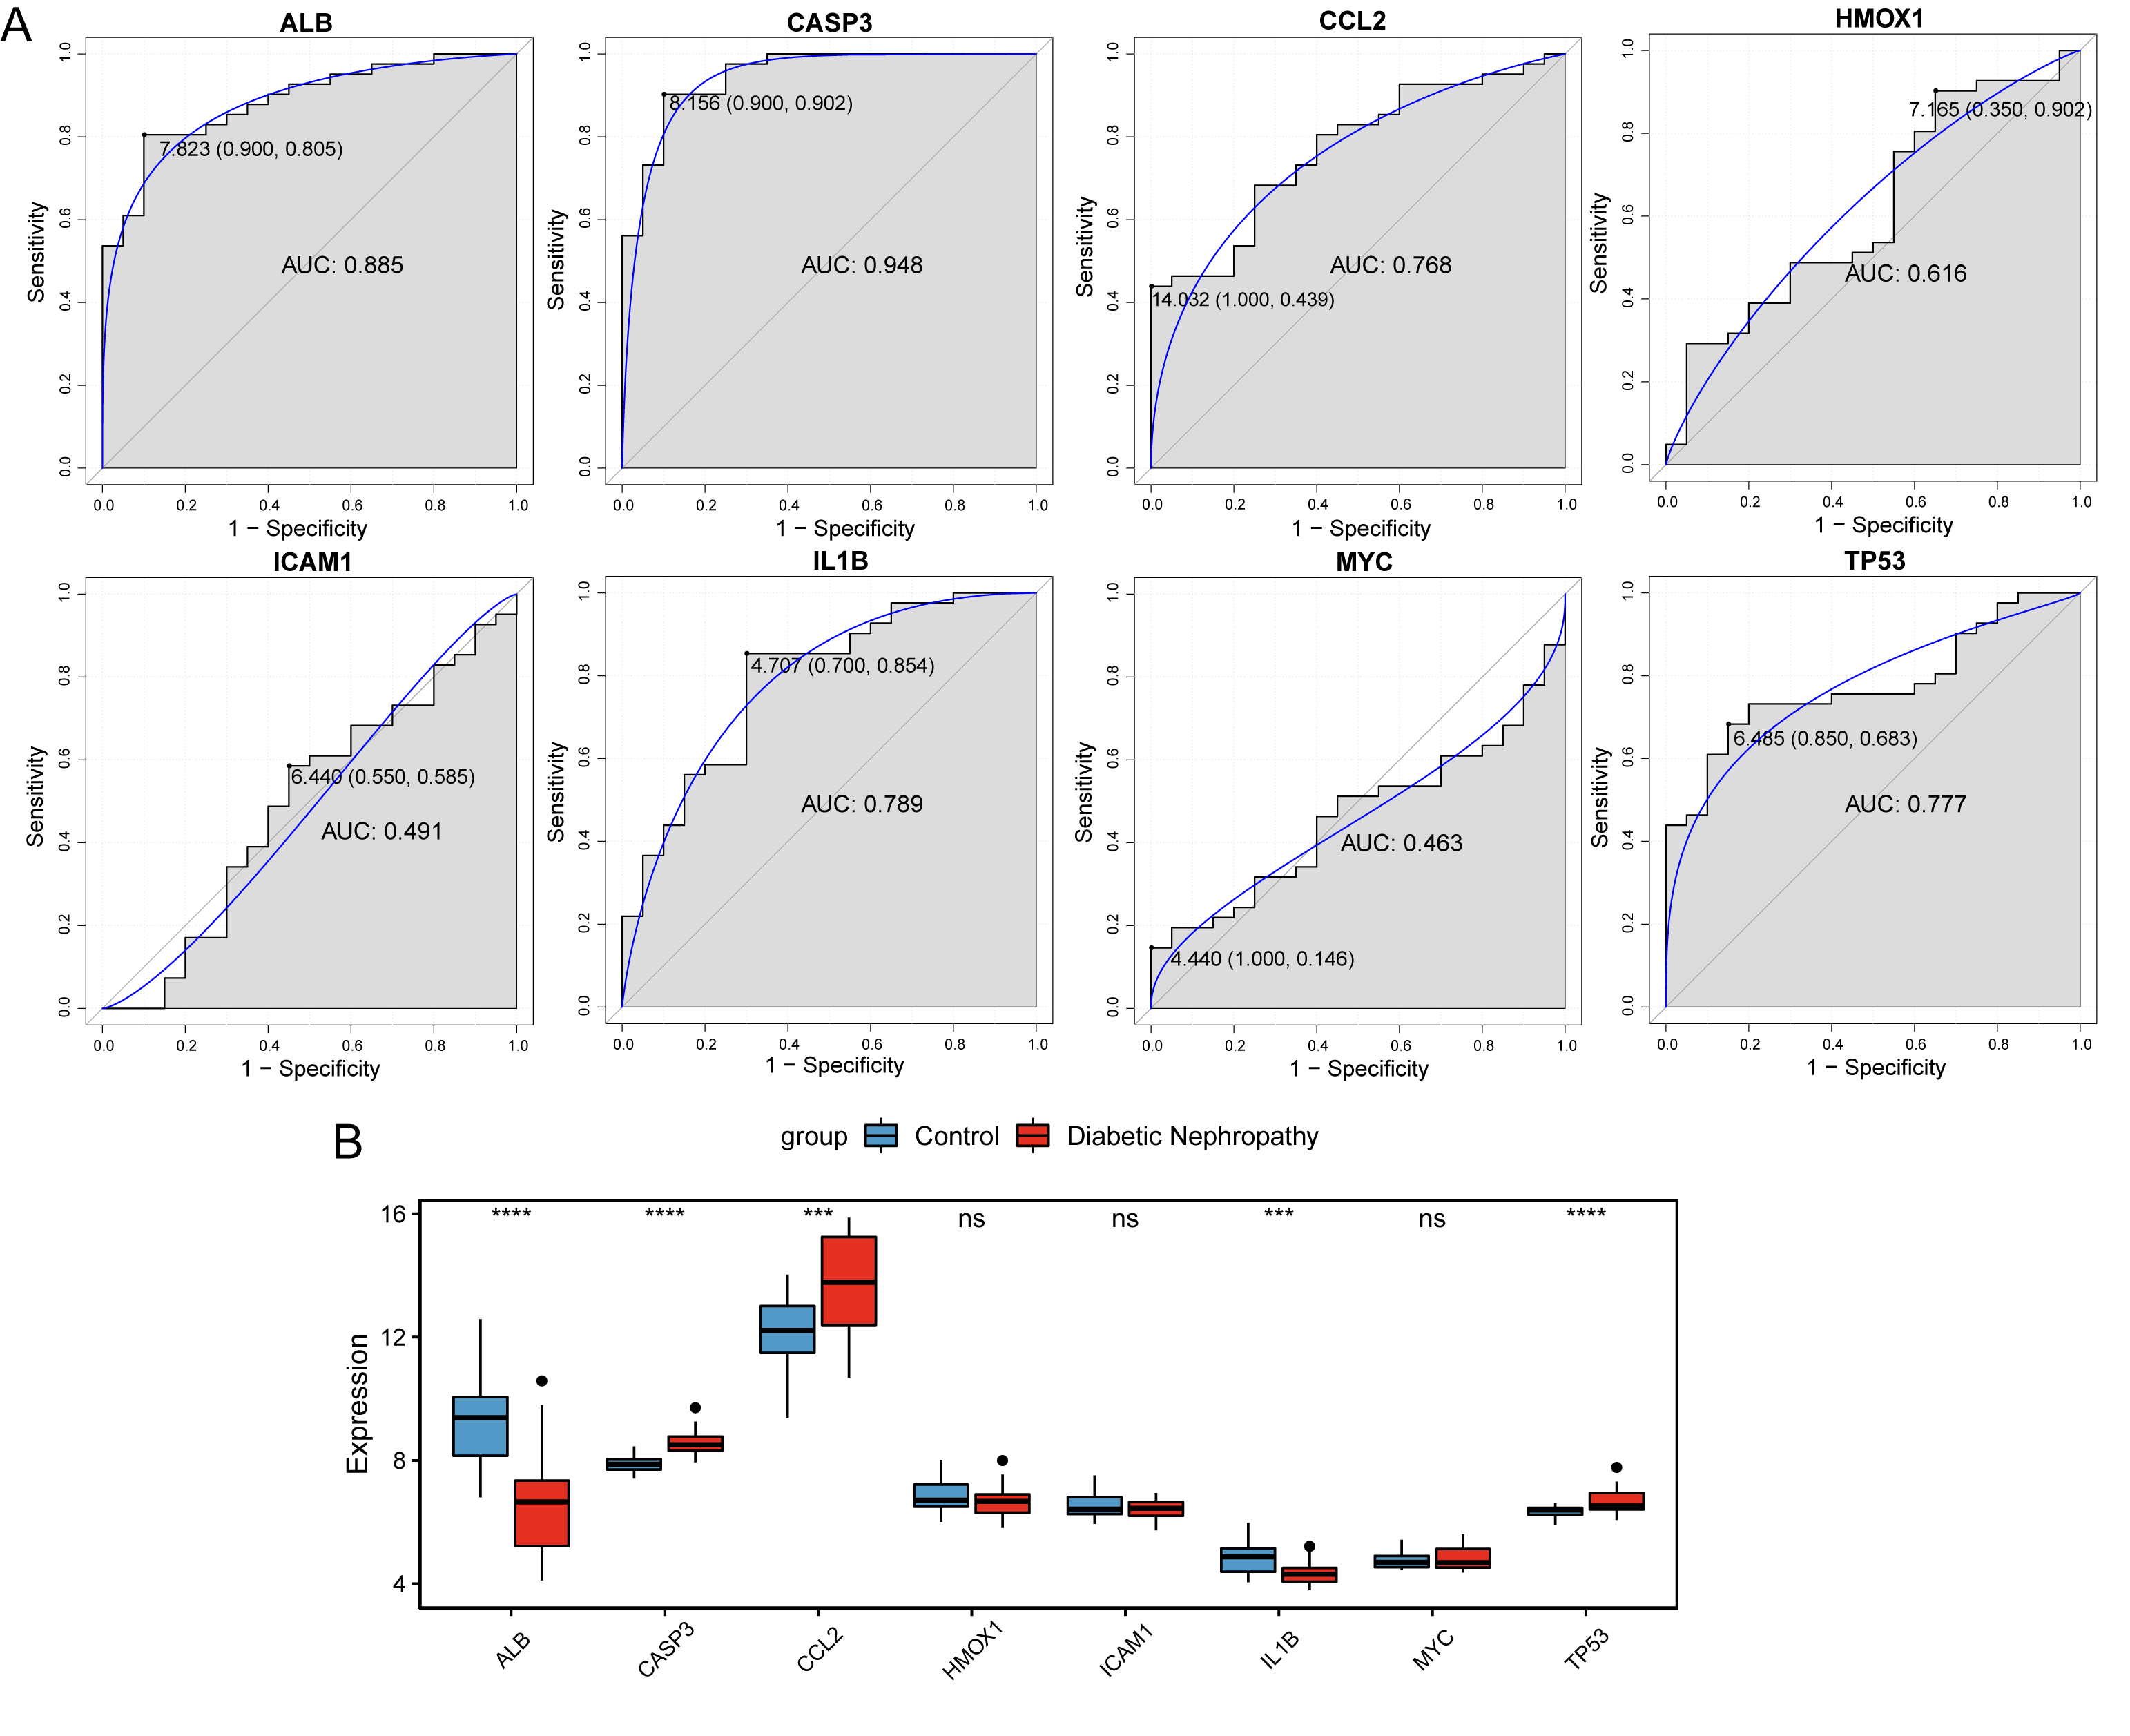


**Figure S2. ROC curve analysis of hub genes in the GSE96804 dataset.** (A) ROC curve analysis of 8 hub genes. A specific threshold point is marked on the curve with the corresponding sensitivity and specificity. (B) The differential expression analysis of hub genes between DN and control samples. ns, no significance. ****P* <0.001, *****P* <0.0001.

**Table S1 Primer sequence used for real-time PCR**

| **Primer** | Primer sequence (5’-3’) | |
| --- | --- | --- |
| GAPDH | F | CTGGAGAAACCTGCCAAGTATG |
|  | R | GGTGGAAGAATGGGAGTTGCT |
| TP53 | F | AGTGTGGTGGTGCCCTATGAG |
|  | R | CAGTGTGATGATGGTGAGGATGG |
| MYC | F | CGTCCTCGGATTCTCTGCTCTC |
|  | R | TCCTCATCTTCTTGTTCCTCCTCAG |
| IL-1β | F | ATGGCTTATTACAGTGGCAATGAGG |
|  | R | AGTGGTGGTCGGAGATTCGTAG |
| ICAM1 | F | ACCTATGGCAACGACTCCTTCTC |
|  | R | GTGTCTCCTGGCTCTGGTTCC |
| HOMX1 | F | GCCAGTGCCACCAAGTTCAAG |
|  | R | GATGTTGAGCAGGAACGCAGTC |
| CCL2 | F | CCAGCAGCAAGTGTCCCAAAG |
|  | R | TGCTTGTCCAGGTGGTCCATG |
| CASP3 | F | ACAGACAGTGGTGTTGATGATGAC |
|  | R | ATGGCACAAAGCGACTGGATG |
| ALB | F | AATGATGAGATGCCTGCTGACTTG |
|  | R | CACGACAGAGTAATCAGGATGCC |
